# Supplementary material for: Alterations of the Muscular Fatty Acid Composition and Serum Metabolome in Bama Xiang Mini-Pigs Exposed to Dietary Beta-Hydroxy Beta-Methyl Butyrate
Source: MDPI journal article supplement (doi:10.3390/ani11051190), 2021-04-21
Supplement: s1 [file s1]

**Table S1.** Primers used for real-time PCR.

| Genes.         | Primers | Sequences (5'-3')        | Size (bp) | Accession No.  | T <sub>A</sub> (°C) <sup>1</sup> |
|----------------|---------|--------------------------|-----------|----------------|----------------------------------|
| <i>ACC</i>     | Forward | ATCCCTCCTTGCTCTCCTA      | 208       | NM_001114269   | 58                               |
|                | Reverse | ACTTCCCGTTCAGATTTCGG     |           |                |                                  |
| <i>FAS</i>     | Forward | CTACCTTGTGGATCACTGCATAGA | 114       | NM_001099930   | 60                               |
|                | Reverse | GGCGTCTCCTCCAAGTTCTG     |           |                |                                  |
| <i>HSL</i>     | Forward | GCAGCATCTTCTTCCGCACA     | 195       | HM_591297      | 62                               |
|                | Reverse | AGCCCTTGCGTAGAGTGACA     |           |                |                                  |
| <i>CPT1B</i>   | Reverse | ACTGTCTGGGCAAACCAAAC     | 176       | NM_001007191   | 60                               |
|                | Forward | CTTCTTGATGAGGCCTTTGC     |           |                |                                  |
| <i>FATP-1</i>  | Reverse | GGAGTAGAGGGCAAAGCAGG     | 208       | JN713898       | 64                               |
|                | Forward | AGGTCTGGCGTGGGTCAAAG     |           |                |                                  |
| <i>FABP4</i>   | Reverse | TGGAAACTTGTCTCCAGTG      | 147       | HM_453202      | 58                               |
|                | Forward | GGTACTTTCTGATCTAATGGTG   |           |                |                                  |
| <i>C/EBPα</i>  | Reverse | AACAACCTGAGCCGCGAACTGGA  | 170       | XM_003127015   | 60                               |
|                | Forward | CTTGAGATCTGGAGACCCGAAACC |           |                |                                  |
| <i>PPARγ</i>   | Reverse | TGACCATGGTTGACACCG       | 381       | XM_005669790   | 58                               |
|                | Forward | AAGCATGAACTCCATAGTGG     |           |                |                                  |
| <i>β-actin</i> | Forward | TGCGGGACATCAAGGAGAAG     | 216       | XM_003357928.2 | 64                               |
|                | Reverse | AGTTGAAGGTGGTCTCGTGG     |           |                |                                  |

<sup>1</sup> T<sub>A</sub>: annealing temperature.**Table S2.** Growth performance and intramuscular fat of Bama Xiang mini-pigs fed the diets with various levels of HMB (n = 8)<sup>1</sup>.

| Items <sup>2</sup>                 | Dietary levels of HMB, % |                     |                     |                      | SEM   | P-values |
|------------------------------------|--------------------------|---------------------|---------------------|----------------------|-------|----------|
|                                    | 0                        | 0.13                | 0.64                | 1.28                 |       |          |
| Initial BW, kg                     | 8.62                     | 8.56                | 8.58                | 8.57                 | 0.403 | 0.999    |
| Final BW, kg                       | 24.73 <sup>b</sup>       | 26.87 <sup>a</sup>  | 24.84 <sup>b</sup>  | 25.37 <sup>b</sup>   | 0.422 | 0.021    |
| ADG, g/d                           | 268.54 <sup>b</sup>      | 305.10 <sup>a</sup> | 271.04 <sup>b</sup> | 279.98 <sup>ab</sup> | 1.808 | 0.036    |
| ADFI, g/d                          | 1085.90                  | 1195.13             | 1093.00             | 1137.79              | 3.825 | 0.241    |
| F:G                                | 4.05                     | 3.91                | 4.06                | 4.09                 | 0.224 | 0.817    |
| Intramuscular fat (%)              |                          |                     |                     |                      |       |          |
| <i>Longissimus thoracis muscle</i> | 3.73 <sup>a</sup>        | 3.02 <sup>b</sup>   | 3.61 <sup>a</sup>   | 3.63 <sup>a</sup>    | 0.235 | 0.002    |
| <i>Soleus muscle</i>               | 3.66                     | 3.30                | 3.60                | 3.53                 | 0.226 | 0.171    |

<sup>1</sup> The data about growth performance has been published and can be found in the following reference, that is, Zheng CB, Song B, Zheng J, et al. Effects of dietary supplementation of beta-hydroxy-beta-methylbutyrate on growth performance and liver lipid metabolism of Bama Xiang pigs. *Chinese Journal of Animal Nutrition*, 2021, 33(7): <https://kns.cnki.net/kcms/detail/11.5461.S.20210316.0920.012.html>. <sup>2</sup> ADG, average daily gain; ADFI, average daily feed intake; F:G, feed:gain. <sup>ab</sup> Means with different superscripts within a row differ (P < 0.05).

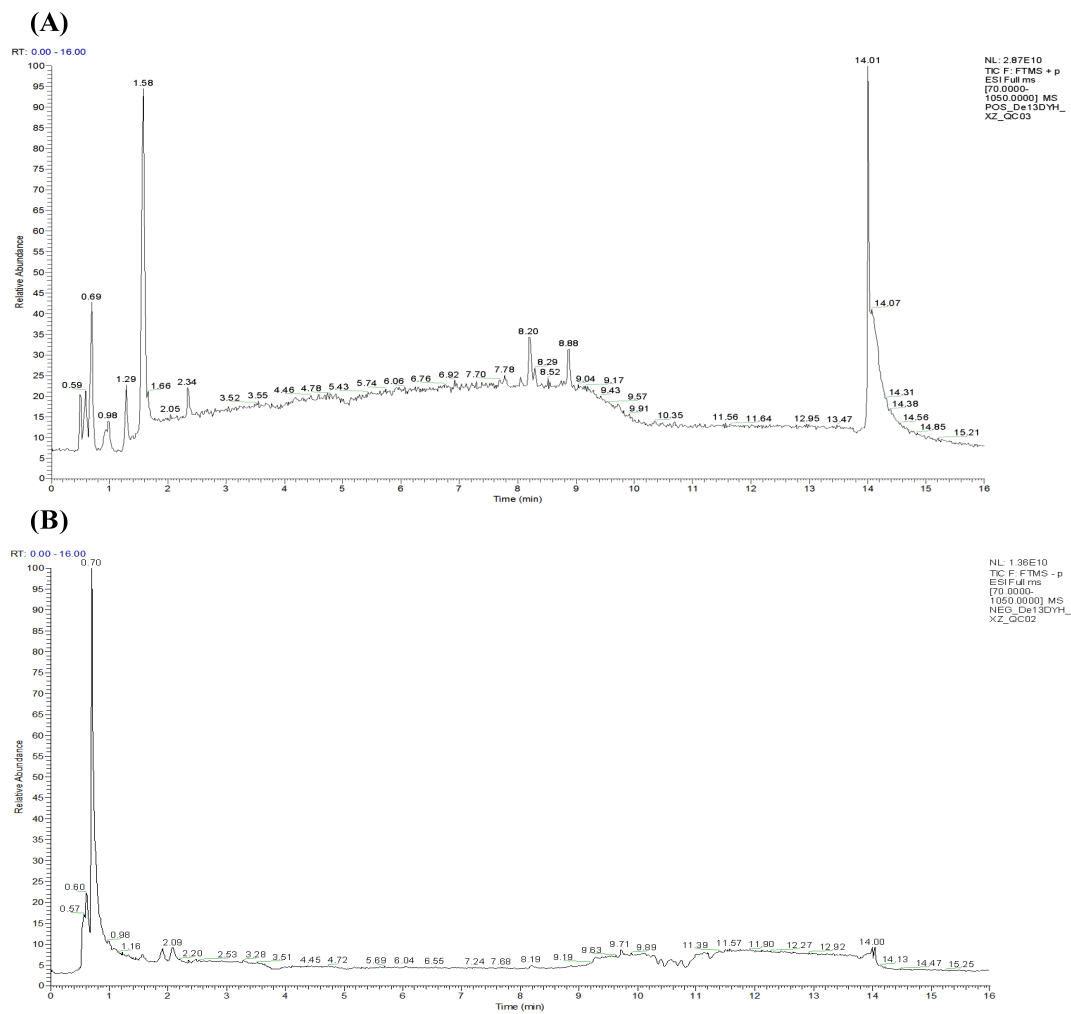

**Figure S1.** The total ion chromatogram of serum QC samples in positive (A) and negative (B) ion modes based on UHPLC-QE-HFX/MS platform.
